# Supplementary material
Source: PubMed Central journal article supplement (PMC10125646)
Supplement: jasn-34-755-s001.pdf [file jasn-34-755-s001.pdf]

## **Supplemental table of contents**

**Supplemental figure 1.** Genotyping of TIGIT-KO mice.

**Supplemental figure 2.** Gating strategy to assess TIGIT expression in Kidney and spleen.

**Supplemental figure 3.** Intracellular cytokine analysis of TIGIT+ and TIGIT- subsets of CD8 and DN T cells.

**Supplemental figure 4.** Analysis of memory phenotype in TIGIT+ and TIGIT- subsets of CD4+, CD8+ and DN kidney T cells.

**Supplemental figure 5.** TIGIT assessment in splenic Tregs at baseline and post-IR.

**Supplemental figure 6.** Intracellular cytokine analysis of CD4 and CD8 T cells from WT and TIGIT-KO kidneys at baseline.

**Supplemental figure 7.** scRNA-Seq analysis of flow sorted kidney CD45+ cells from WT and TIGIT-KO kidney at baseline and 24h post-IR injury.

**Supplemental table 1:** Primer sequences for CMV Cre and internal positive control used for genotyping TIGIT-KO mice.

**Supplemental table 2:** PCR conditions for CMV Cre detection.

**Supplemental table 3:** List of differentially expressed genes identified in bulk RNA-Seq analysis of flow-sorted CD4+ T cells from control and 24h post-IR kidneys of WT mice. (Excel File).

**Supplemental table 4:** KPMP scRNA-Seq data output result showing *TIGIT* expression by human kidney T cell subsets.

## Supplemental figure legends

**Supplemental Figure 1. Genotyping of TIGIT-KO mice.** TIGIT-KO mice genotyping using CMV *Cre* detection using PCR primer and conditions provided in supplemental table 1 and 2 respectively. Lane 1 showing 100bp DNA ladder. TIGIT-KO mice in lane 2 showing 650bp PCR band, which is absent in WT mice in lane 3. Lanes 2 and 3 showing, 324bp internal positive control band in both TIGIT-KO and WT mice.

**Supplemental Figure 2. Gating strategy to assess TIGIT expression in Kidney and spleen. (A).** Gating strategy used to define different kidney T cell populations and TIGIT+ and TIGIT- populations. **(B)** TIGIT expression in splenic T cells. Percentage of TIGIT expressing CD4+, CD8+ and DN T cells in spleen from control, sham, and post-IR (24h) mice. Data between groups was analyzed with unpaired non-parametric Mann-Whitney test. Graphs representing median (IQR) values.

**Supplemental Figure 3. Intracellular cytokine analysis of TIGIT+ and TIGIT- subsets of CD8 and DN T cells. (A, B and C, D)** Representative histograms and corresponding graphs showing percentage and MFI of proinflammatory cytokines IFN $\gamma$  and TNF $\alpha$  in TIGIT+ and TIGIT- CD8+ T cells in control (baseline) and 24h after IR injury. **(E, F and G, H)** Representative histograms and corresponding graphs showing percentage and MFI of proinflammatory cytokines IFN $\gamma$  and TNF $\alpha$  in TIGIT+ and TIGIT- DN T cells in control (baseline) and 24h after IR injury. Data between groups was analyzed with unpaired non-parametric Mann-Whitney test. Graphs representing median (IQR) values. \* =  $p \leq 0.05$ , \*\* =  $p \leq 0.01$ .

**Supplemental Figure 4. Analysis of memory phenotype in TIGIT+ and TIGIT- subsets of CD4+, CD8+ and DN kidney T cells. (A)** Representative flow dot plots showing gating strategy used to define naïve, EM and CM subsets of TIGIT+ and TIGIT- T cells. **(B)** MFI of CD62L and CD44 expression in TIGIT+ and TIGIT- kidney CD4+ T cells at baseline and **(C)** after IR injury. **(D, E and F, G)** Percentage of naïve, EM and CM cells among TIGIT+ and TIGIT- CD8+ and DN T cells at baseline and 24h after IR injury. **(H, I and J, K)** MFI of CD62L and CD44 expression in TIGIT+ and TIGIT- CD8+ and DN T cells, at baseline and 24h after IR injury. Data between groups was analyzed with unpaired non-parametric Mann-Whitney test. Graphs representing median (IQR) values. \* =  $p \leq 0.05$ , \*\* =  $p \leq 0.01$ , \*\*\* =  $p \leq 0.001$ .

**Supplemental Figure 5. TIGIT assessment in splenic Tregs at baseline and post-IR. (A)** Percentage of TIGIT+ and TIGIT- splenic Tregs among CD4+ T cells at baseline. **(B)** Percentage of TIGIT+ splenic Tregs at baseline (control) and 24h after kidney IR injury. Data between groups was analyzed with unpaired non-parametric Mann-Whitney test. Graphs representing median (IQR) values. \*\* =  $p \leq 0.01$

**Supplemental Figure 6. Intracellular cytokine analysis of CD4 and CD8 T cells from WT and TIGIT-KO kidneys at baseline. (A, B and C, D)** Percentage of IFN $\gamma$ - and TNF $\alpha$ -expressing CD4 and CD8 T cells from WT and TIGIT-KO kidneys at baseline. Data between groups was analyzed with unpaired non-parametric Mann-Whitney test. Graphs representing median (IQR) values. \*\* =  $p \leq 0.01$

**Supplemental Figure 7. scRNA-Seq analysis of flow sorted kidney CD45+ cells from WT and TIGIT-KO kidney at baseline and 24h post-IR injury. (A)** Violin plot showing absence of *Tigit* expression in immune cells from TIGIT-KO mice compare to WT mice. **B)** Violin plot showing increased *Tigit* expression in post-IR T cells compared to baseline T cells in WT mice kidneys. **(C)** Violin plot representing *Tigit* expression in different T cell subsets at baseline.

### Supplemental Figure 1

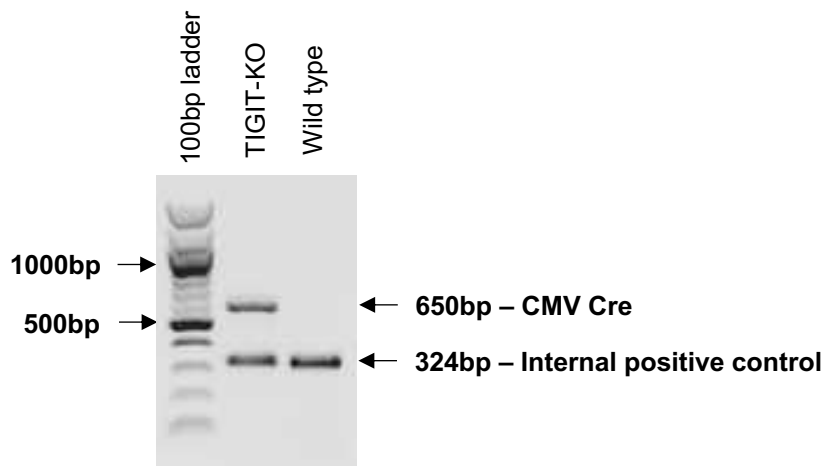

## Supplemental Figure 2

**A**

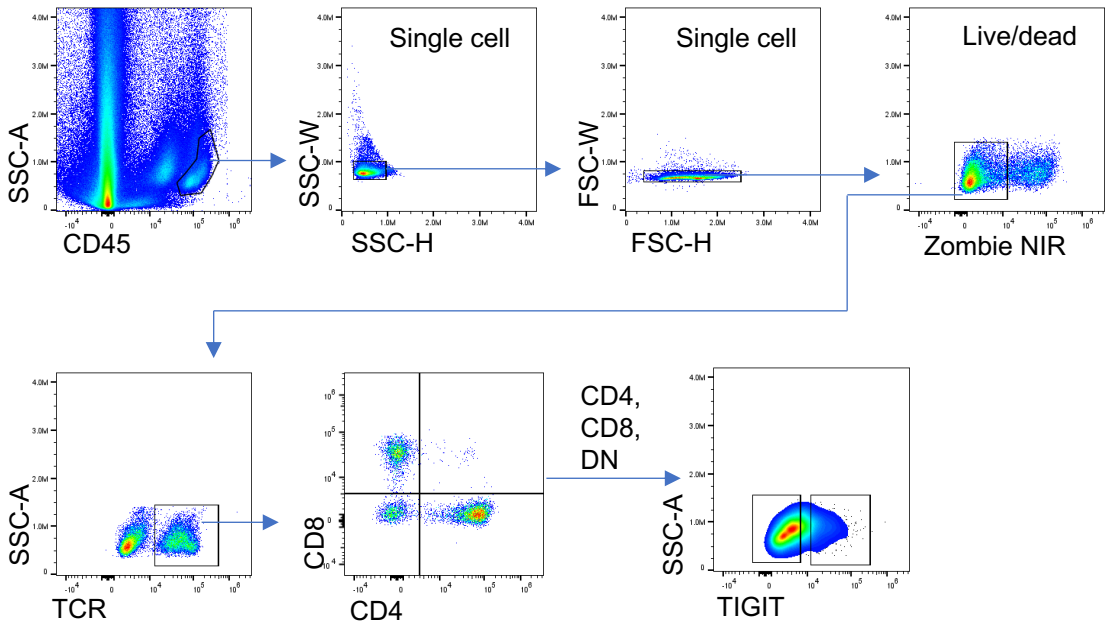

**B**

**Spleen**

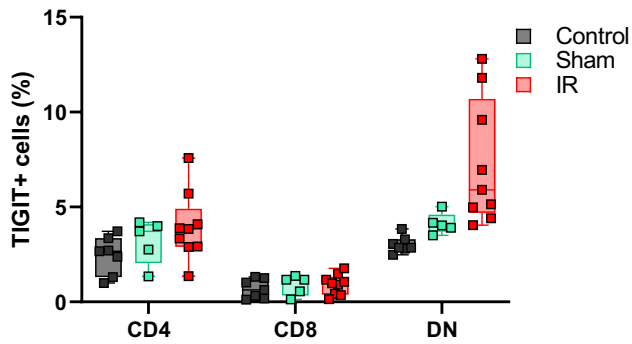

### Supplemental Figure 3

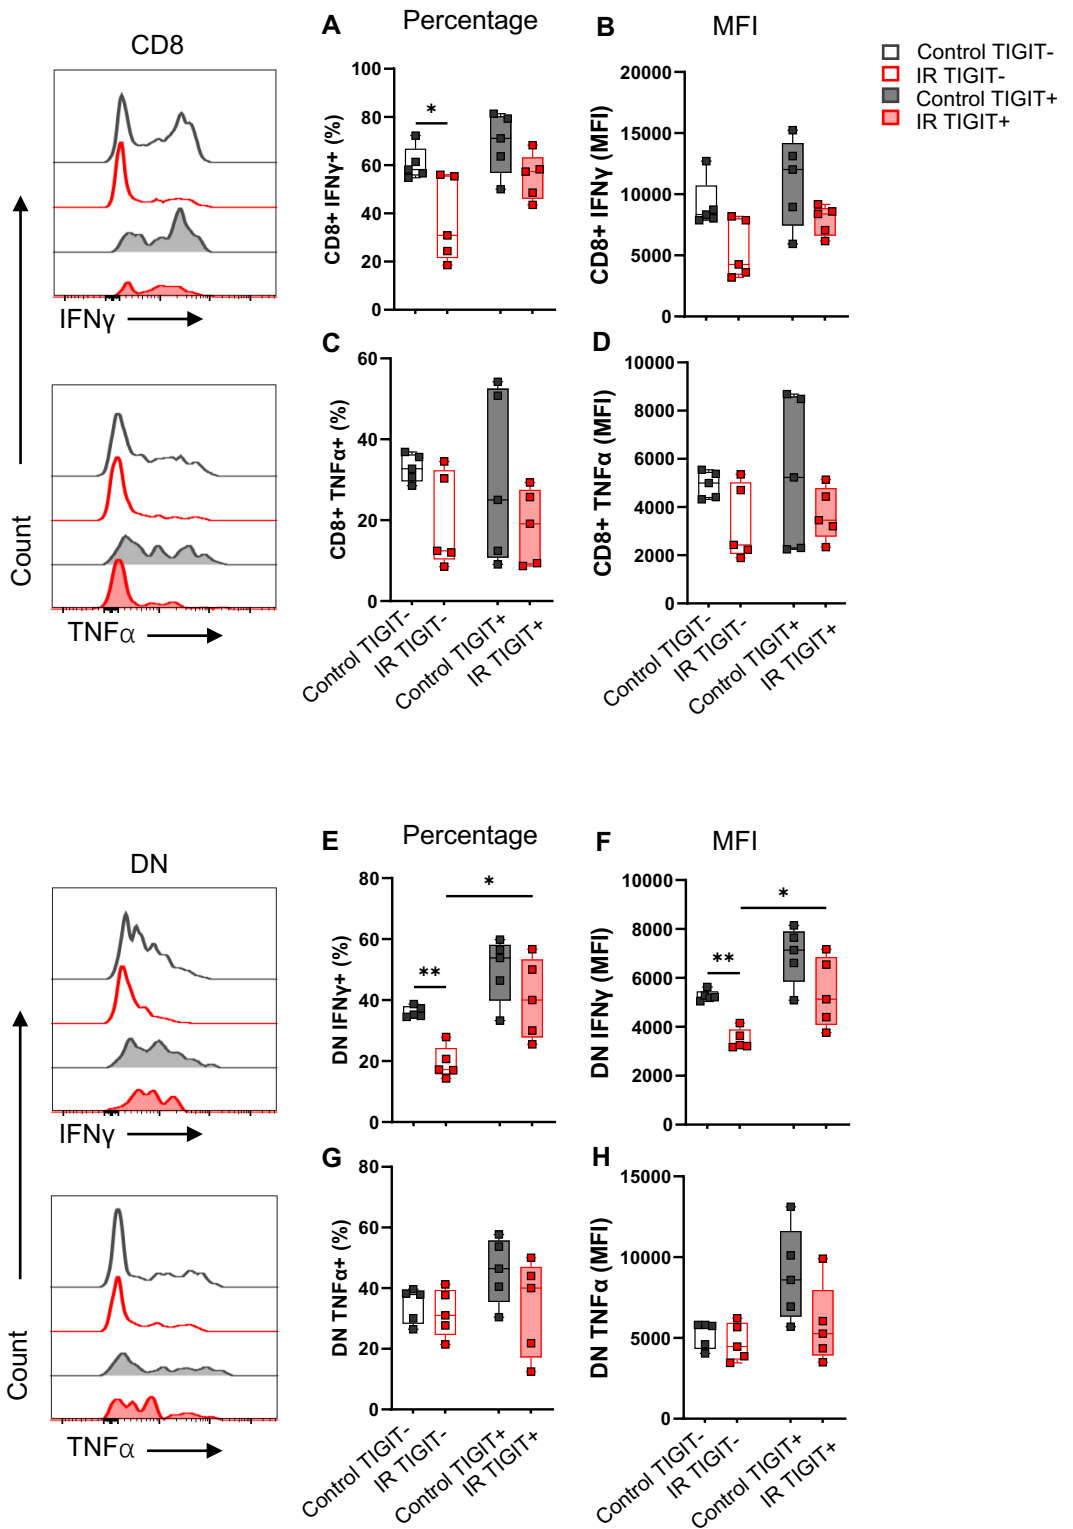

## Supplemental Figure 4

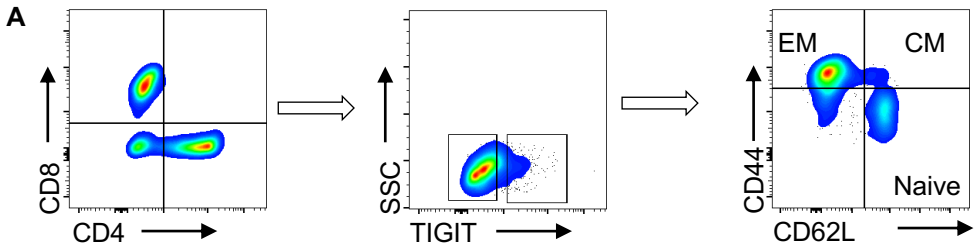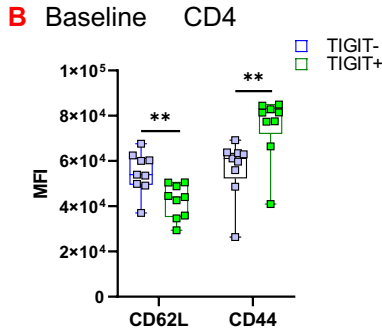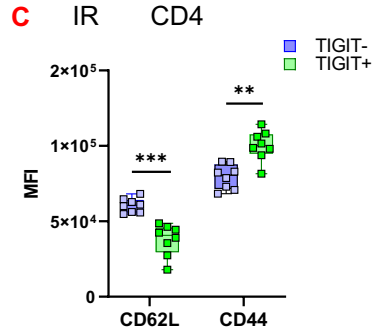

Baseline

Baseline

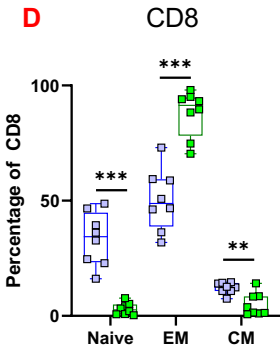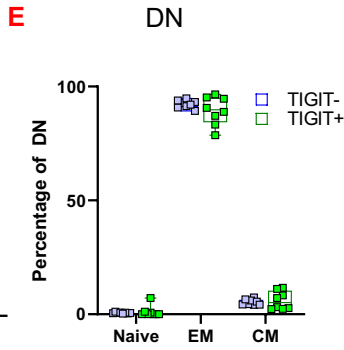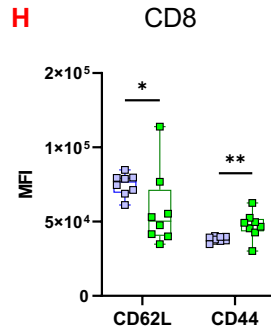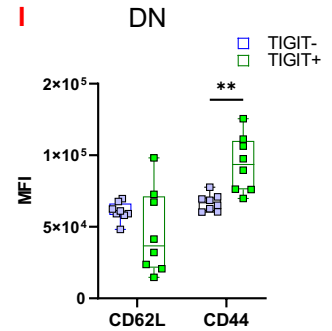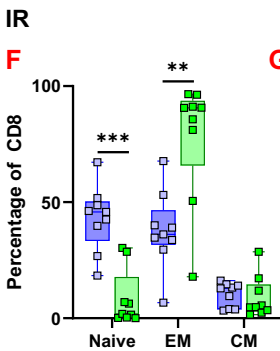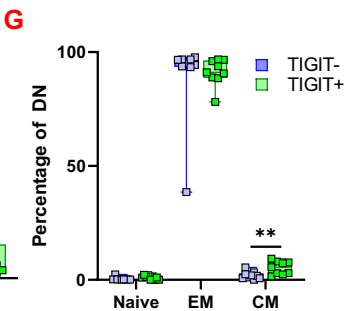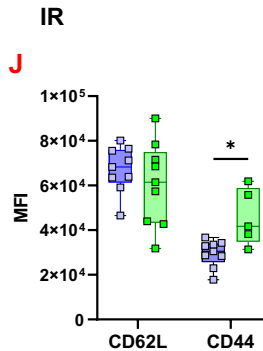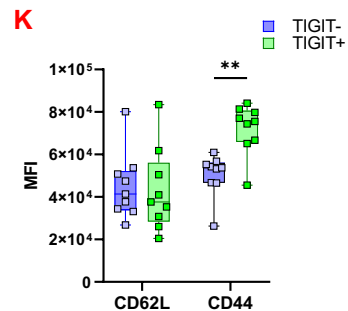



# Supplemental figure 5

## Spleen

**A**

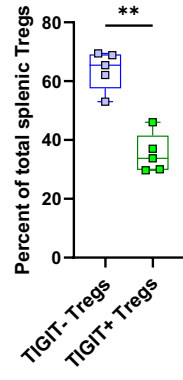

**B**

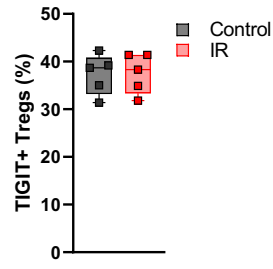

Supplemental figure 6

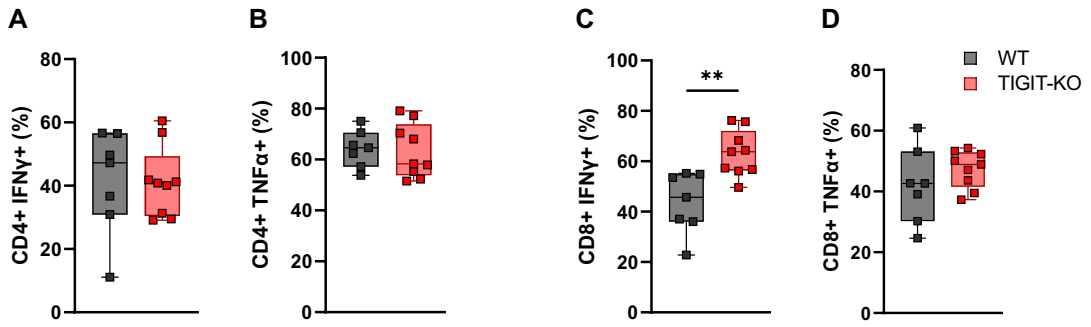

### Supplemental Figure 7

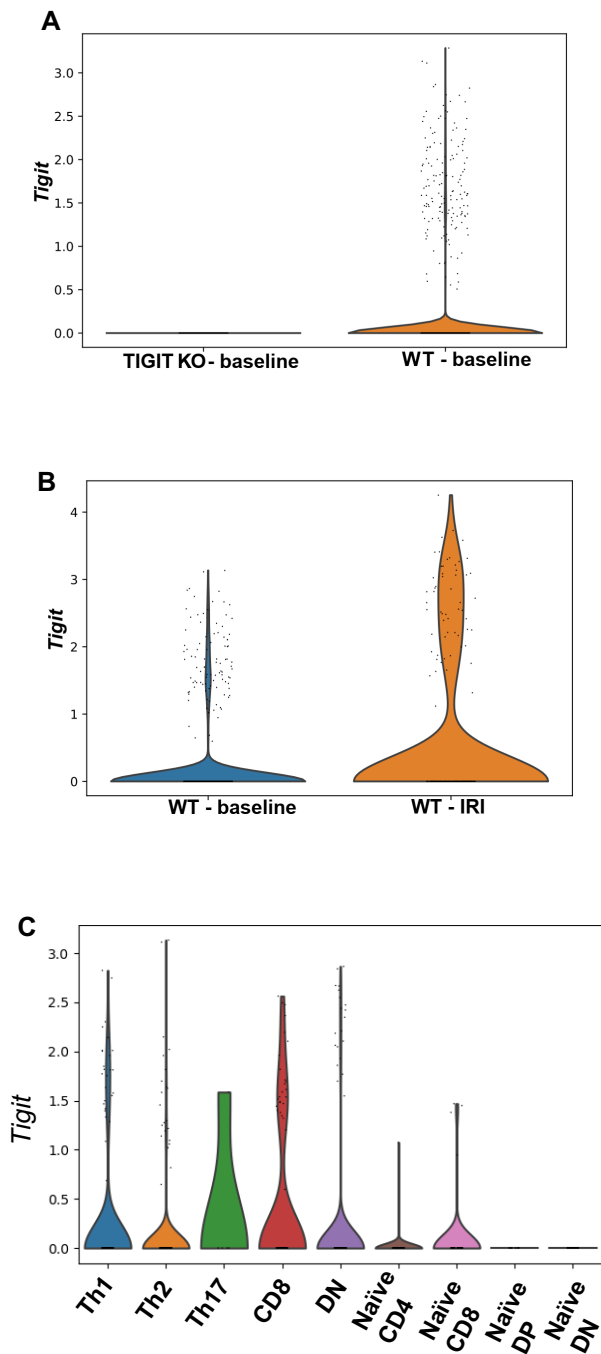

### Supplemental Table 1

|                                                 |                                 |
|-------------------------------------------------|---------------------------------|
| <b>CMV Cre (NJ-Seq-7) forward primer</b>        | 5'-GACGGTGTCTCTCCATCTC -3'      |
| <b>CMV Cre (NJ-Seq-20) reverse primer</b>       | 5'-GGAAGGGGAAGAGAGGACAA -3'     |
| <b>Internal positive control forward primer</b> | 5'-CTAGGCCACAGAATTGAAAGATCT-3'  |
| <b>Internal positive control reverse primer</b> | 5'-GTAGGTGGAAATTCTAGCATCATCC-3' |

**Supplemental Table 1.** Primer sequences used for CMV *Cre* detection in TIGIT KO mice and internal positive control to confirm successful PCR

### Supplemental Table 2

| <b>Step</b> | <b>Temperature</b> | <b>time</b> | <b>cycles</b> |
|-------------|--------------------|-------------|---------------|
| 1           | 94°C               | 3 min       |               |
| 2           | 94°C               | 30 sec      |               |
| 3           | 61°C               | 45 sec      | 35<br>cycles  |
| 4           | 72°C               | 1 min       |               |
| 5           | 72°C               | 5 min       |               |
| 6           | 4°C                | hold        |               |

**Supplemental Table 2.** PCR conditions for CMV *Cre* detection

## Supplemental Table 4

### TIGIT Expression Comparison across Clusters in AKI

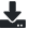

NS = Not Significant

| ABBR   | CLUSTER ( <i>predicted state</i> )             | # CELLS IN CLUSTER | MEAN EXPRESSION | CLUSTER VS ALL OTHERS |             |           |             |
|--------|------------------------------------------------|--------------------|-----------------|-----------------------|-------------|-----------|-------------|
|        |                                                |                    |                 | % CELLS EXPRESSING    | FOLD CHANGE | P VALUE   | ADJ P VALUE |
| T-REG  | Regulatory T Cell                              | 150                | 7.10            | 62.0                  | 2.81        | 2.17e-205 | 6.60e-201   |
| NKT    | Natural Killer T Cell                          | 889                | 2.66            | 27.9                  | 1.71        | 9.43e-107 | 2.87e-102   |
| T-CYT  | Cytotoxic T Cell                               | 479                | 1.85            | 23.6                  | 1.30        | 1.69e-69  | 5.14e-65    |
| NK1    | Natural Killer Cell Type 1                     | 426                | 2.17            | 23.7                  | 1.46        | 5.97e-59  | 1.82e-54    |
| cycT   | T Cell ( <i>cycling</i> <sup>2</sup> )         | 153                | 1.31            | 20.9                  | 0.972       | 2.29e-35  | 6.96e-31    |
| NK2    | Natural Killer Cell Type 2                     | 93                 | 1.12            | 14.0                  | 0.851       | 1.13e-9   | 0.0000344   |
| EC-AEA | Afferent / Efferent Arteriole Endothelial Cell | 516                | 0               | NS                    | NS          | NS        | NS          |

**Supplemental Table 4.** KPMP scRNA-Seq data output result showing *TIGIT* expression by different T cells subsets compared to all other cell type clusters in AKI patients.
